# Supplementary material for: Human-specific mutations in VMAT1 confer functional changes and multi-directional evolution in the regulation of monoamine circuits
Source: BMC Evol Biol. 2019 Dec 2;19:220. doi: 10.1186/s12862-019-1543-8 (PMC6889191; doi:10.1186/s12862-019-1543-8)
Supplement: Supplementary file 7 — Additional file 7: Table S5. Primers used in the present study. [file 12862_2019_1543_MOESM7_ESM.docx]

**Table S5**. Used primers for generating constructs and confirming sequences.

| Purpose | Primer name | Sequence (5' to 3') | Start site1 |
| --- | --- | --- | --- |
| Amplification of *VMAT1* cDNA | Forward | AAAGATCTCTCCGGACCATTCTGGATG |  |
| Reverse | TTGAATTCCTACTCCTCATGGTCAGGC |  |
|  |  |  |  |
| Site-directed mutagenesis | I136T_F | GTTTCTTGGAGGAAGAGACTACCCGGGTCGGGGTTC |  |
| I136T_R | GAACCCCGACCCGGGTAGTCTCTTCCTCCAAGAAAC |  |
| I136N_F | GTTTCTTGGAGGAAGAGAATACCCGGGTCGGGGTTC |  |
| I136N_R | GAACCCCGACCCGGGTATTCTCTTCCTCCAAGAAAC |  |
| G130E_F | CTGCTTGCAAGGCACAGAATTCTTGGAGGAAGAGAA |  |
| G130E_R | TTCTCTTCCTCCAAGAATTCTGTGCCTTGCAAGCAG |  |
| N136T_F2 | GAATTCTTGGAGGAAGAGACTACCCGGGTCGGG |  |
| N136T_R2 | CCCGACCCGGGTAGTCTCTTCCTCCAAGAATTC |  |
|  |  |  |  |
| Sequence confirmation | F1 | GGCACCAAAATCAACGGGAC | –148 |
| F2 | AGGACGACGGCAACTACAAG | 304 |
| F3 | TCCGGACTCAGATCTCTCCG | 717 |
| F4 | CCGTGGCTGTTGAAGAAAGC | 994 |
| F5 | GGAGCTCCCTTTGGAAGTGT | 1455 |
| F6 | CCTCATTGGCACCAACCTCT | 1775 |

1The first nucleotide site of YFP was regarded as 0 and the last nucleotide of VMAT1 was the 2306th site.

2These primers were used for the VMAT1 plasmid encoding 130Glu/136Asn.
